# Supplementary material
Source: PubMed Central journal article supplement (PMC11029368)
Supplement: 262_2015_1775_MOESM1_ESM.pdf [file 262_2015_1775_MOESM1_ESM.pdf]

**Supplementary Table S1** Correlation between peritumoral CD8<sup>+</sup> T cells and intratumoral CD4<sup>+</sup>Foxp3<sup>+</sup> Tregs and clinicopathologic factors in patients undergoing pancreatectomy for PDAC (*n*=92)

|                     | CD8 <sup>+</sup> T cells <sup>1</sup> |      |          |             |      |          | Tregs <sup>1</sup> |      |          |             |      |          |
|---------------------|---------------------------------------|------|----------|-------------|------|----------|--------------------|------|----------|-------------|------|----------|
|                     | Intratumoral                          |      |          | Peritumoral |      |          | Intratumoral       |      |          | Peritumoral |      |          |
|                     | Low                                   | High | <i>P</i> | Low         | High | <i>P</i> | Low                | High | <i>P</i> | Low         | High | <i>P</i> |
| No. of patients     | 42                                    | 50   |          | 42          | 50   |          | 48                 | 44   |          | 56          | 36   |          |
| Age, years          |                                       |      |          |             |      |          |                    |      |          |             |      |          |
| ≤60                 | 24                                    | 21   | 0.148    | 19          | 26   | 0.518    | 25                 | 20   | 0.525    | 31          | 14   | 0.123    |
| >60                 | 18                                    | 29   |          | 23          | 24   |          | 23                 | 24   |          | 25          | 22   |          |
| Sex                 |                                       |      |          |             |      |          |                    |      |          |             |      |          |
| Male                | 34                                    | 34   | 0.159    | 32          | 36   | 0.648    | 34                 | 34   | 0.482    | 40          | 28   | 0.498    |
| Female              | 8                                     | 16   |          | 10          | 14   |          | 14                 | 10   |          | 16          | 8    |          |
| Tumor location      |                                       |      |          |             |      |          |                    |      |          |             |      |          |
| Head                | 32                                    | 40   | 0.659    | 30          | 42   | 0.145    | 40                 | 32   | 0.218    | 47          | 25   | 0.100    |
| Body or tail        | 10                                    | 10   |          | 12          | 8    |          | 8                  | 12   |          | 9           | 11   |          |
| UICC stage          |                                       |      |          |             |      |          |                    |      |          |             |      |          |
| I+II                | 27                                    | 39   | 0.146    | 31          | 35   | 0.686    | 35                 | 31   | 0.793    | 39          | 27   | 0.578    |
| III                 | 15                                    | 11   |          | 11          | 15   |          | 13                 | 13   |          | 17          | 9    |          |
| Histologic grading  |                                       |      |          |             |      |          |                    |      |          |             |      |          |
| 1+2                 | 26                                    | 35   | 0.413    | 26          | 35   | 0.413    | 34                 | 27   | 0.337    | 40          | 21   | 0.195    |
| 3                   | 16                                    | 15   |          | 16          | 15   |          | 14                 | 17   |          | 16          | 15   |          |
| Perineural invasion |                                       |      |          |             |      |          |                    |      |          |             |      |          |
| Yes                 | 35                                    | 37   | 0.280    | 35          | 37   | 0.280    | 36                 | 36   | 0.428    | 44          | 28   | 0.928    |
| No                  | 7                                     | 13   |          | 7           | 13   |          | 12                 | 8    |          | 12          | 8    |          |
| Vascular invasion   |                                       |      |          |             |      |          |                    |      |          |             |      |          |
| Yes                 | 4                                     | 5    | 0.939    | 3           | 6    | 0.435    | 6                  | 3    | 0.359    | 6           | 3    | 0.708    |
| No                  | 38                                    | 45   |          | 39          | 44   |          | 42                 | 41   |          | 50          | 33   |          |
| Lymphatic invasion  |                                       |      |          |             |      |          |                    |      |          |             |      |          |
| Yes                 | 17                                    | 15   | 0.293    | 14          | 18   | 0.789    | 15                 | 17   | 0.457    | 22          | 10   | 0.258    |
| No                  | 25                                    | 35   |          | 28          | 32   |          | 33                 | 27   |          | 34          | 26   |          |

UICC Union for International Cancer Control, Tregs regulatory T cells

<sup>1</sup> Using median values as cutoff

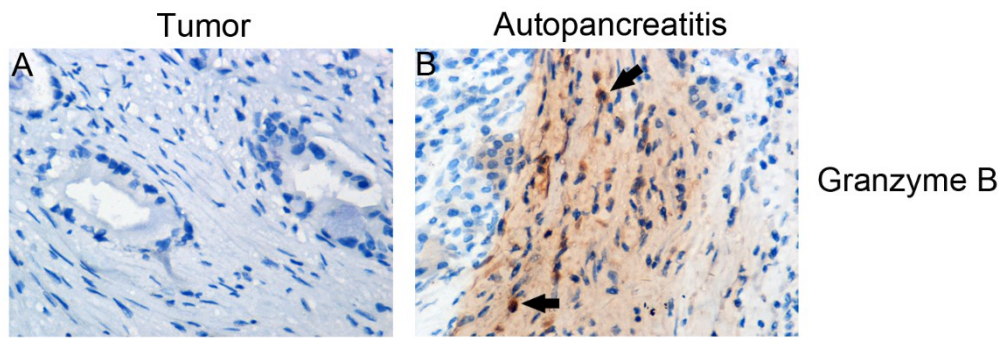

**Supplementary Figure S1** Granzyme B immunostaining.

Granzyme B positive cells (black arrow) were not seen in tumor (**A**), but were seen in autoimmune pancreatitis tissue (**B**). (400× magnification)
